# Supplementary material for: Bright tunable luminescence of Sb3+ doping in zero-dimensional lead-free halide Cs3ZnCl5 perovskite crystals
Source: Royal Society of Chemistry journal article supplement (doi:10.1039/d2dt01243j), 2022-01-01
Supplement: d2dt01243j1.pdf [file d2dt01243j1.pdf]

## Electronic Supplementary Information

### Bright tunable luminescence of Sb<sup>3+</sup> doping in zero-dimensional lead-free halide Cs<sub>3</sub>ZnCl<sub>5</sub> perovskite crystals

Xiaoxia Liu, Weibing Zhang,\* Rui Xu, Jiayu Tu, Guoyong Fang\* Yuexiao Pan\*

*Key Laboratory of Carbon Materials of Zhejiang Province, College of Chemistry and Materials Engineering, Wenzhou University, Wenzhou 325035, P.R. China.*

E-mail: 00111040@wzu.edu.cn; fanggy@wzu.edu.cn; yxpan@wzu.edu.cn

Fax&Tel: +86-577-8837-3017

**Table S1.** The experimental mole ratio of Cs, Zn and Sb calculated from starting materials and the actual doping concentration in crystals Cs<sub>3</sub>ZnCl<sub>5</sub>:Sb measured in the sample by using inductive coupled plasma emission spectrometer (ICP).

| Experimental mole ratio                                                    | Actual contents | Actual contents | Actual doping       |
|----------------------------------------------------------------------------|-----------------|-----------------|---------------------|
|                                                                            | of Cs           | of Zn           | concentration of Sb |
| Cs <sub>3</sub> Zn <sub>0.985</sub> Cl <sub>5</sub> :0.015Sb <sup>3+</sup> | 48.14%          | 13.60%          | 0.10%               |
| Cs <sub>3</sub> Zn <sub>0.97</sub> Cl <sub>5</sub> :0.03Sb <sup>3+</sup>   | 46.37%          | 11.67%          | 0.52%               |
| Cs <sub>3</sub> Zn <sub>0.95</sub> Cl <sub>5</sub> :0.05Sb <sup>3+</sup>   | 46.50%          | 10.55%          | 1.22%               |
| Cs <sub>3</sub> Zn <sub>0.9</sub> Cl <sub>5</sub> :0.1Sb <sup>3+</sup>     | 46.08%          | 9.88%           | 2.25%               |
| Cs <sub>3</sub> Zn <sub>0.7</sub> Cl <sub>5</sub> :0.3Sb <sup>3+</sup>     | 47.02%          | 8.88%           | 4.46%               |
| Cs <sub>3</sub> Zn <sub>0.5</sub> Cl <sub>5</sub> :0.5Sb <sup>3+</sup>     | 45.84%          | 6.91%           | 5.67%               |

**Table S2.** The lattice parameters of  $\text{Cs}_3\text{ZnCl}_5$  and  $\text{Sb}^{3+}$ -doped  $\text{Cs}_3\text{ZnCl}_5$

| Crystal                                  | a (Å)  | b (Å)  | c (Å)  | $\alpha$ (°) | $\beta$ (°) | $\gamma$ (°) |
|------------------------------------------|--------|--------|--------|--------------|-------------|--------------|
| $\text{Cs}_3\text{ZnCl}_5$ (Exp.)        | 9.758  | 9.758  | 9.758  | 123.468      | 123.468     | 84.091       |
| $\text{Cs}_3\text{ZnCl}_5$ (Comput.)     | 9.931  | 9.931  | 9.931  | 123.498      | 123.498     | 84.040       |
| Sb- $\text{Cs}_3\text{ZnCl}_5$ (Comput.) | 10.448 | 10.448 | 10.448 | 126.985      | 126.985     | 78.275       |

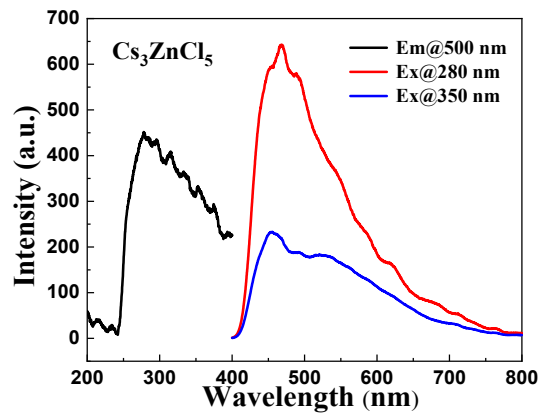

**Figure S1.** Excitation and emission spectra of undoped  $\text{Cs}_3\text{ZnCl}_5$  measured at room temperature.

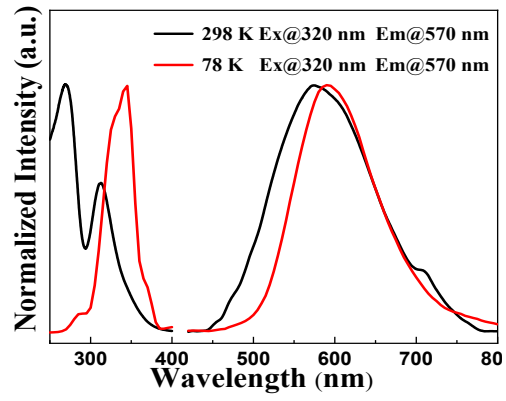

**Figure S2.** Excitation and emission spectra of  $\text{Cs}_3\text{Zn}_{0.5}\text{Cl}_5:0.5\text{Sb}^{3+}$  measured at 78 K and 298 K, respectively.

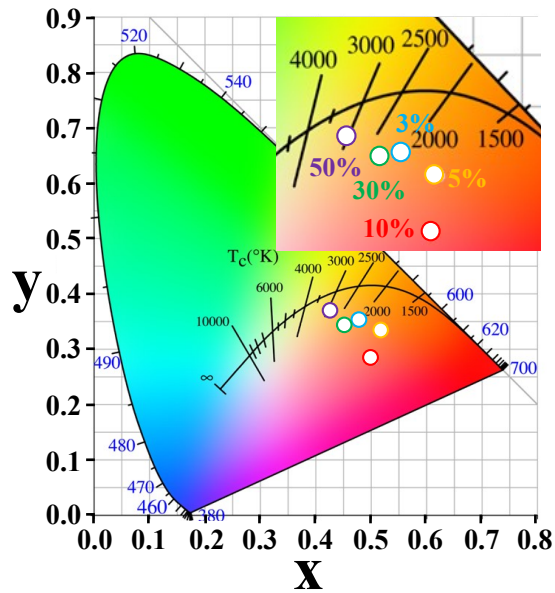

**Figure S3.** CIE chromaticity coordinates of  $\text{Cs}_3\text{Zn}_{1-x}\text{Cl}_5:x\text{Sb}^{3+}$  ( $x = 3\text{-}50$  mol%) excited at 320 nm.

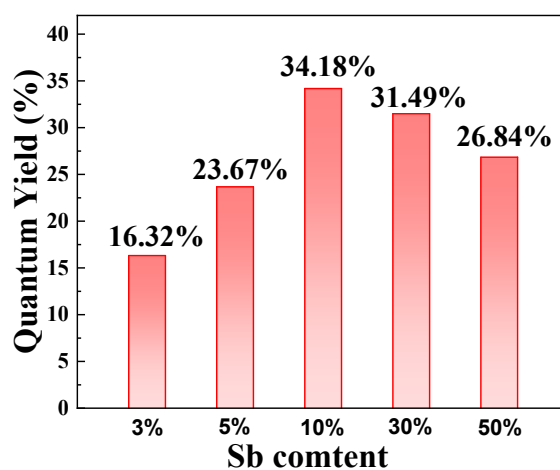

**Figure S4.** PLQY of  $\text{Cs}_3\text{Zn}_{1-x}\text{Cl}_5:x\text{Sb}^{3+}$  ( $x = 3\text{-}50$  mol%) excited at 320 nm.

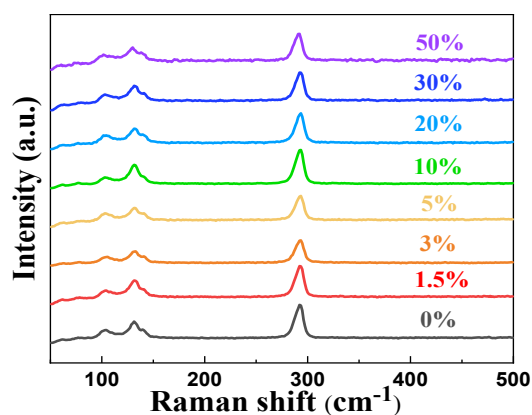

**Figure S5.** The Raman spectra of  $\text{Cs}_3\text{ZnCl}_5$  and  $\text{Cs}_3\text{ZnCl}_5:\text{Sb}^{3+}$  doped with different concentration of  $\text{Sb}^{3+}$  (performed using Horiba Jobin Yvon LabRAM HR80 equipped with a microscope and a CCD camera as the detector and a 532 nm diode laser as the excitation source).

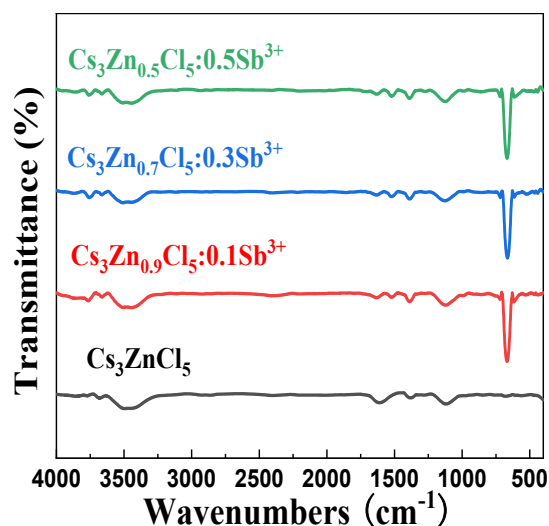

**Figure S6.** The infrared (IR) spectra of the  $\text{Cs}_3\text{ZnCl}_5$ ,  $\text{Cs}_3\text{Zn}_{0.9}\text{Cl}_5:0.1\text{Sb}^{3+}$ ,  $\text{Cs}_3\text{Zn}_{0.7}\text{Cl}_5:0.3\text{Sb}^{3+}$ , and  $\text{Cs}_3\text{Zn}_{0.5}\text{Cl}_5:0.5\text{Sb}^{3+}$  performed on Perkin-Elmer 580 B infrared spectrophotometer using the KBr pellet technique.

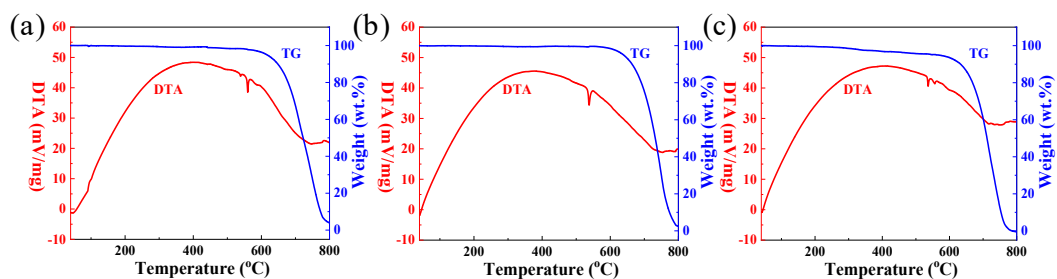

**Figure S7.** The thermogravimetrics (TG) analysis and differential thermal analysis (DTA) of (a)  $\text{Cs}_3\text{ZnCl}_5$ , (b)  $\text{Cs}_3\text{Zn}_{0.9}\text{Cl}_5:0.1\text{Sb}^{3+}$ , and (c)  $\text{Cs}_3\text{Zn}_{0.5}\text{Cl}_5:0.5\text{Sb}^{3+}$  performed on a PerkinElmer Diamond TG-DTA at  $10\text{ }^\circ\text{C}/\text{min}$  in an argon flow from room temperature to  $800\text{ }^\circ\text{C}$  under  $\text{N}_2$  atmosphere.
